# Supplementary material for: Identification of a Putative SARS-CoV-2 Main Protease Inhibitor through In Silico Screening of Self-Designed Molecular Library
Source: MDPI journal article supplement (doi:10.3390/ijms241411390), 2023-07-13
Supplement: s1 [file s1]

*Article*

## **Identification of a Putative SARS-COV-2 Main Protease Inhibitor through In Silico Screening of Self-designed Molecular Library**

**Nanxin Liu <sup>1</sup>, Zeyu Yang <sup>1</sup>, Yuying Liu <sup>1</sup>, Xintao Dang <sup>1</sup>, Qingqing Zhang <sup>1</sup>, Jin Wang <sup>1</sup>, Xueying Liu <sup>2</sup>, Jie Zhang <sup>1</sup> and Xiaoyan Pan <sup>1,\*</sup>**

<sup>1</sup> School of Pharmacy, Health Science Center, Xi'an Jiaotong University, Xi'an, 710061, China.

<sup>2</sup> School of Pharmacy, The Fourth Military Medical University, Xi'an, 710032, China.

\* Correspondence: panxy2016@xjtu.edu.cn.

**Table S1. Docking Score of All Compounds**

| Title | SMILE                                                                               | docking binding<br>energy( $\Delta G$ ,<br>kcal/mol) |
|-------|-------------------------------------------------------------------------------------|------------------------------------------------------|
| V1    | 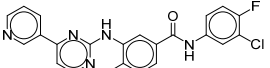   | -6.626                                               |
| V2    |    | -6.472                                               |
| V3    |    | -6.52                                                |
| V4    |    | -6.527                                               |
| V5    |    | -6.36                                                |
| V6    |    | -6.86                                                |
| V7    |  | -6.711                                               |
| V8    |  | -6.221                                               |
| V9    |  | -6.475                                               |
| V10   |  | -6.533                                               |
| V11   |  | -6.466                                               |
| V12   |  | -7.192                                               |
| V13   |  | -6.733                                               |
| V14   |  | -6.682                                               |

|     |  |        |
|-----|--|--------|
| V15 |  | -6.136 |
| V16 |  | -6.321 |
| V17 |  | -6.407 |
| V18 |  | -6.411 |
| V19 |  | -6.101 |
| V20 |  | -6.529 |
| V21 |  | -6.763 |
| V22 |  | -6.061 |
| V23 |  | -6.659 |
| V24 |  | -5.908 |
| V25 |  | -5.956 |
| V26 |  | -5.842 |
| V27 |  | -6.12  |
| V28 |  | -5.487 |

|     |                                                                                     |        |
|-----|-------------------------------------------------------------------------------------|--------|
| V29 | 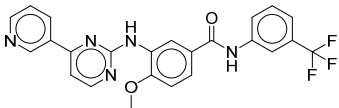   | -6.303 |
| V30 |    | -6.415 |
| V31 |    | -6.799 |
| V32 |    | -5.602 |
| V33 |    | -6.088 |
| V34 |   | -6.715 |
| V35 |  | -6.282 |
| V36 |  | -6.126 |
| V37 |  | -6.401 |
| V38 |  | -5.925 |
| V39 |  | -6.62  |
| V40 |  | -6.268 |
| V41 |  | -5.188 |
| V42 |  | -5.813 |

|     |                                                                                     |        |
|-----|-------------------------------------------------------------------------------------|--------|
| V43 | 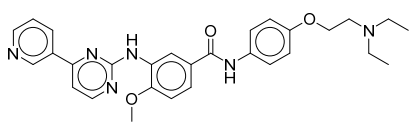   | -6.381 |
| V44 |    | -6.525 |
| V45 |    | -6.403 |
| V46 |    | -5.05  |
| V47 |    | -6.01  |
| V48 |   | -5.521 |
| V49 |  | -6.328 |
| V50 |  | -5.535 |
| V51 |  | -6.039 |
| V52 |  | -5.586 |
| V53 |  | -6.355 |
| V54 |  | -6.813 |
| V55 |  | -6.767 |
| V56 |  | -6.645 |

|     |                                                                                     |        |
|-----|-------------------------------------------------------------------------------------|--------|
| V57 | 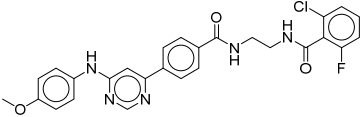   | -5.978 |
| V58 |    | -7.013 |
| V59 |    | -6.951 |
| V60 |    | -7.261 |
| V61 |    | -6.346 |
| V62 |    | -6.572 |
| V63 |   | -6.43  |
| V64 |  | -6.551 |
| V65 |  | -6.611 |
| V66 |  | -6.883 |
| V67 |  | -6.629 |
| V68 |  | -5.99  |
| V69 |  | -5.648 |
| V70 |  | -7.299 |

|     |                                                                                     |        |
|-----|-------------------------------------------------------------------------------------|--------|
| V71 | 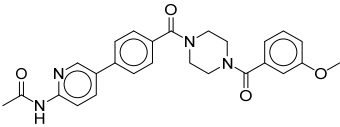   | -6.066 |
| V72 |    | -6.833 |
| V73 |    | -6.759 |
| V74 |    | -7.225 |
| V75 |    | -7.331 |
| V76 |    | -6.335 |
| V77 |   | -5.902 |
| V78 |  | -6.866 |
| V79 |  | -6.627 |
| V80 |  | -6.066 |
| V81 |  | -6.061 |
| V82 |  | -5.21  |
| V83 |  | -6.68  |
| V84 |  | -6.903 |

|     |                                                                                     |        |
|-----|-------------------------------------------------------------------------------------|--------|
| V85 | 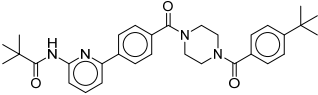   | -5.975 |
| V86 |    | -7.085 |
| V87 |    | -6.971 |
| V88 |    | -4.961 |
| V89 |    | -6.948 |
| V90 |    | -6.195 |
| V91 |   | -6.571 |
| V92 |  | -6.089 |
| V93 |  | -5.944 |
| V94 |  | -6.336 |
| V95 |  | -6.179 |
| V96 |  | -6.921 |
| V97 |  | -7.138 |
| V98 |  | -6.929 |



|      |                                                                                     |        |
|------|-------------------------------------------------------------------------------------|--------|
| V99  | 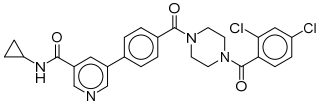   | -6.541 |
| V100 |    | -6.713 |
| V101 |    | -5.911 |
| V102 |    | -5.655 |
| V103 |    | -7.535 |
| V104 |    | -6.66  |
| V105 |   | -6.812 |
| V106 |  | -6.927 |
| V107 |  | -6.807 |
| V108 |  | -5.975 |
| V109 |  | -7.567 |
| V110 |  | -6.331 |
| V111 |  | -7.195 |
| V112 |  | -7.29  |

|      |                                                                                     |        |
|------|-------------------------------------------------------------------------------------|--------|
| V113 | 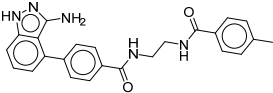   | -5.688 |
| V114 |    | -6.728 |
| V115 |    | -6.622 |
| V116 |    | -6.331 |
| V117 |    | -5.895 |
| V118 |    | -6.412 |
| V119 |   | -5.765 |
| V120 |  | -7.081 |
| V121 |  | -5.925 |
| V122 |  | -7.095 |
| V123 |  | -6.219 |
| V124 |  | -6.607 |
| V125 |  | -6.991 |
| V126 |  | -6.89  |

|      |                                                                                     |        |
|------|-------------------------------------------------------------------------------------|--------|
| V127 | 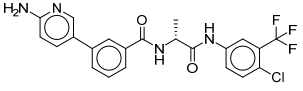   | -6.773 |
| V128 |    | -7.264 |
| V129 |    | -6.636 |
| V130 |    | -6.44  |
| V131 |    | -7.876 |
| V132 |    | -6.415 |
| V133 |   | -8.379 |
| V134 |  | -5.713 |
| V135 |  | -6.087 |
| V136 |  | -6.662 |
| V137 |  | -6.378 |
| V138 |  | -6.75  |
| V139 |  | -7.422 |
| V140 |  | -6.773 |

|      |                                                                                     |        |
|------|-------------------------------------------------------------------------------------|--------|
| V141 | 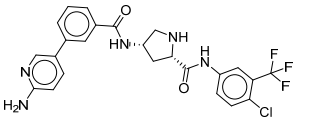   | -6.33  |
| V142 |    | -6.301 |
| V143 |    | -6.433 |
| V144 |    | -7.195 |
| V145 |    | -6.482 |
| V146 |    | -6.017 |
| V147 |   | -7.364 |
| V148 |  | -6.25  |
| V149 |  | -6.896 |
| V150 |  | -7.145 |
| V151 |  | -6.441 |
| V152 |  | -6.778 |
| V153 |  | -6.788 |
| V154 |  | -7.26  |
| V155 |  | -7.113 |

|      |  |        |
|------|--|--------|
| V156 |  | -6.984 |
| V157 |  | -6.881 |
| V158 |  | -6.892 |
| V159 |  | -7.091 |
| V160 |  |        |
| V161 |  | -6.514 |
| V162 |  | -6.545 |
| V163 |  | -7.052 |
| V164 |  | -6.587 |
| V165 |  | -7.051 |
| V166 |  | -6.978 |
| V167 |  | -6.702 |
| V168 |  | -7.182 |
| V169 |  | -6.611 |

|      |                                                                                     |        |
|------|-------------------------------------------------------------------------------------|--------|
| V170 | 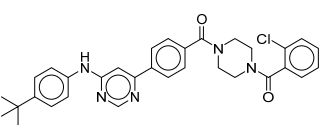   | -7.085 |
| V171 |    | -6.902 |
| V172 |    | -7.403 |
| V173 |    | -7.138 |
| V174 |    | -7.369 |
| V175 |    | -7.538 |
| V176 |   | -6.275 |
| V177 |  | -6.861 |
| V178 |  | -6.171 |
| V179 |  | -5.036 |
| V180 |  | -6.406 |
| V181 |  | -5.335 |
| V182 |  | -5.516 |
| V183 |  | -6.283 |

|      |                                                                                     |        |
|------|-------------------------------------------------------------------------------------|--------|
| V184 | 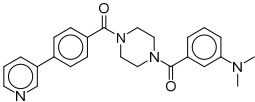   | -5.509 |
| V185 |    | -6.401 |
| V186 |    | -6.067 |
| V187 |    | -6.328 |
| V188 |    | -5.094 |
| V189 |    | -6.027 |
| V190 |   | -6.42  |
| V191 |  | -5.786 |
| V192 |  | -6.034 |
| V193 |  | -5.887 |
| V194 |  | -6.209 |
| V195 |  | -5.696 |
| V196 |  | -5.185 |
| V197 |  | -5.434 |

|      |                                                                                     |        |
|------|-------------------------------------------------------------------------------------|--------|
| V198 | 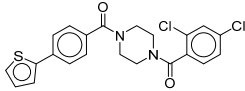   | -6.823 |
| V199 |    | -5.635 |
| V200 |    | -5.655 |
| V201 |    | -5.182 |
| V202 |    | -6.075 |
| V203 |    | -6.661 |
| V204 |   | -7.89  |
| V205 |  | -7.501 |
| V206 |  | -6.213 |
| V207 |  | -6.222 |
| V208 |  | -6.951 |
| V209 |  | -6.811 |
| V210 |  | -6.676 |
| V211 |  | -6.714 |



|      |                                                                                     |        |
|------|-------------------------------------------------------------------------------------|--------|
| V212 | 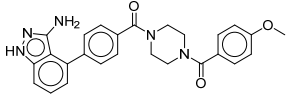   | -7.688 |
| V213 |    | -6.946 |
| V214 |    | -5.958 |
| V215 |    | -7.032 |
| V216 |    | -6.946 |
| V217 |    | -6.482 |
| V218 |   | -5.841 |
| V219 |  | -7.212 |
| V220 |  | -6.013 |
| V221 |  | -6.943 |
| V222 |  | -7.305 |
| V223 |  | -6.69  |
| V224 |  | -6.764 |
| V225 |  | -7.068 |

|      |  |        |
|------|--|--------|
| V226 |  | -7.141 |
| V227 |  | -6.403 |
| V228 |  | -8.122 |
| V229 |  | -7.509 |
| V230 |  | -7.314 |
| V231 |  | -7.372 |
| V232 |  | -6.088 |
| V233 |  | -6.277 |
| V234 |  | -6.263 |
| V235 |  | -6.649 |
| V236 |  | -6.902 |
| V237 |  | -6.847 |
| V238 |  | -7.134 |

|      |  |        |
|------|--|--------|
| V239 |  | -6.542 |
| V240 |  | -7.211 |
| V241 |  | -7.108 |
| V242 |  | -6.218 |
| V243 |  | -7.68  |
| V244 |  | -6.494 |
| V245 |  | -7.401 |
| V246 |  | -6.602 |
| V247 |  | -8.538 |
| V248 |  | -7.565 |
| V249 |  | -6.568 |
| V250 |  | -6.449 |

|      |                                                                                     |        |
|------|-------------------------------------------------------------------------------------|--------|
| V251 | 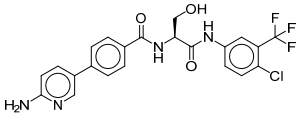   | -5.414 |
| V252 |    | -7.416 |
| V253 |    | -8.832 |
| V254 |    | -7.286 |
| V255 |    | -5.04  |
| V256 |    | -6.19  |
| V257 |   | -7.37  |
| V258 |  | -3.553 |
| V259 |  | -5.516 |
| V260 |  | -6.287 |
| V261 |  | -6.367 |
| V262 |  | -5.971 |
| V263 |  | -4.862 |
| V264 |  | -5.369 |

|      |                                                                                     |        |
|------|-------------------------------------------------------------------------------------|--------|
| V265 | 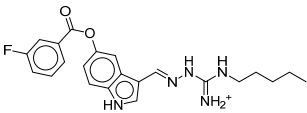   | -5.701 |
| V266 |    | -5.966 |
| V267 |    | -5.793 |
| V268 |    | -5.227 |
| V269 |    | -5.781 |
| V270 |    | -5.137 |
| V271 |   | -6.034 |
| V272 |  | -6.007 |
| V273 |  | -6.396 |
| V274 |  | -5.773 |
| V275 |  | -5.466 |
| V276 |  | -6.569 |
| V277 |  | -4.427 |
| V278 |  | -5.387 |

|      |                                                                                     |        |
|------|-------------------------------------------------------------------------------------|--------|
| V279 | 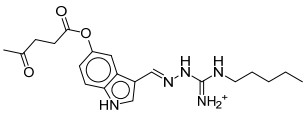   | -4.871 |
| V280 |    | -4.957 |
| V281 |    | -5.4   |
| V282 |    | -7.481 |
| V283 |    | -7.532 |
| V284 |    | -6.727 |
| V285 |    | -6.488 |
| V286 |   | -7.432 |
| V287 |  | -6.09  |
| V288 |  | -6.442 |
| V289 |  | -6.649 |
| V290 |  | -6.502 |
| V291 |  | -8.071 |
| V292 |  | -6.936 |
| V293 |  | -7.205 |

|      |                                                                                     |        |
|------|-------------------------------------------------------------------------------------|--------|
| V294 | 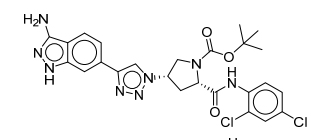   | -6.207 |
| V295 |    | -6.849 |
| V296 |    | -5.938 |
| V297 |    | -6.48  |
| V298 |    | -6.864 |
| V299 |    | -6.747 |
| V300 |   | -6.622 |
| V301 |  | -6.43  |
| V302 |  | -5.789 |
| V303 |  | -7.458 |
| V304 |  | -7.878 |
| V305 |  | -6.156 |
| V306 |  | -7.335 |
| V307 |  | -6.666 |

|           |                                                                                     |        |
|-----------|-------------------------------------------------------------------------------------|--------|
| V308      | 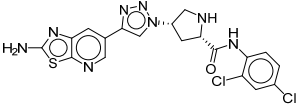   | -6.237 |
| V309      |    | -6.923 |
| V310      |    | -6.808 |
| V311      |    | -6.514 |
| V312      |    | -6.785 |
| V313      |    | -6.472 |
| V314      |   | -6.415 |
| V315      |  | -6.398 |
| V316      |  | -6.937 |
| V317      |  | -6.556 |
| V318      |  | -5.716 |
| Nilotinib |  | -7.026 |



**Table S2.** The interaction between molecule and M<sup>pro</sup> (based on the IFD docking results)

| Compound | Molecular Interactions | Nature of Interactions       | Distance (Å) |
|----------|------------------------|------------------------------|--------------|
| V247     | Lig:N1 - Glu166:OE2    | Salt bridge                  | 3.81         |
|          | Asn142:HD21 - Lig:O4   | Hydrogen Bond                | 2.10         |
|          | Lig:H15 - His164:O     | Hydrogen Bond                | 3.26         |
|          | Lig:H11 - Glu166:O     | Hydrogen Bond                | 1.96         |
|          | Lig:H36 - Glu166:O     | Hydrogen Bond                | 2.69         |
|          | Gln189:HE21 - Lig:O1   | Hydrogen Bond                | 1.96         |
|          | Gln192:HE21 - Lig:N3   | Hydrogen Bond                | 2.60         |
| V253     | Lig:N1 - Glu166:OE2    | Salt bridge                  | 3.17         |
|          | Lig:H19 - Leu141:O     | Hydrogen Bond                | 1.97         |
|          | Gly143:H - Lig:O4      | Hydrogen Bond                | 2.15         |
|          | Ser144:H - Lig:O4      | Hydrogen Bond                | 2.68         |
|          | Cys145:H - Lig:O4      | Hydrogen Bond                | 2.17         |
|          | Lig:H15 - His164:O     | Hydrogen Bond                | 1.78         |
|          | Lig:H28 - Glu166:OE2   | Hydrogen Bond                | 2.43         |
|          | Lig:H11 - Glu166:O     | Hydrogen Bond                | 2.62         |
|          | Gln189:HE21 - Lig:O2   | Hydrogen Bond                | 2.91         |
|          | Gln192:H - Lig:N3      | Hydrogen Bond                | 3.17         |
|          | Gln192:HE21 - Lig:N3   | Hydrogen Bond                | 2.73         |
|          | His41 - Lig            | Hydrophobic (Pi-Pi Stacking) | 5.47         |
| V133     | His41 - Lig            | Hydrophobic (Pi-Pi Stacking) | 5.43         |
|          | Lig:N3 - Glu166:OE2    | Salt bridge                  | 3.23         |
|          | Gly143:H - Lig:O2      | Hydrogen Bond                | 1.91         |
|          | Cys145:H - Lig:O2      | Hydrogen Bond                | 3.33         |
|          | Lig:H28 - Glu166:OE2   | Hydrogen Bond                | 2.36         |
|          | Lig:H24 - Glu166:O     | Hydrogen Bond                | 2.00         |
|          | Lig:H5 - Arg188:O      | Hydrogen Bond                | 2.71         |
|          | Gln189:HE21 - Lig:O1   | Hydrogen Bond                | 1.98         |
| V109     | Lig:N1 - Glu166:OE2    | Salt bridge                  | 2.77         |
|          | His41:HD1 - Lig:O2     | Hydrogen Bond                | 2.21         |
|          | Asn142:HD21 - Lig:O3   | Hydrogen Bond                | 2.13         |
|          | Gly143:H - Lig:O3      | Hydrogen Bond                | 2.12         |
|          | Lig:H11 - Glu166:O     | Hydrogen Bond                | 2.30         |
|          | Lig:H30 - Glu166:OE2   | Hydrogen Bond                | 1.82         |
|          | Gln192:H - Lig:N3      | Hydrogen Bond                | 2.04         |
|          | His41 - Lig            | Hydrophobic (Pi-Pi Stacking) | 5.29         |
| V131     | Lig:H19 - His41:NE2    | Hydrogen Bond                | 3.19         |
|          | Gly143:H - Lig:O3      | Hydrogen Bond                | 1.82         |
|          | Ser144:H - Lig:O3      | Hydrogen Bond                | 2.49         |
|          | Cys145:H - Lig:O3      | Hydrogen Bond                | 2.65         |
|          | Lig:H14 - His164:O     | Hydrogen Bond                | 1.86         |
|          | Lig:H8 - Glu166:O      | Hydrogen Bond                | 2.09         |
|          | Gln192:HE21 - Lig:N2   | Hydrogen Bond                | 3.14         |
|          | Gln192:H - Lig:N2      | Hydrogen Bond                | 3.36         |
|          | Thr26:H - Lig:C11      | Halogen Bond                 | 2.40         |
| V254     | Gly143:H - Lig:O3      | Hydrogen Bond                | 2.23         |
|          | Ser144:H - Lig:O3      | Hydrogen Bond                | 2.29         |
|          | Cys145:H - Lig:O3      | Hydrogen Bond                | 1.98         |
|          | Lig:H18 - His163:NE    | Hydrogen Bond                | 2.02         |
|          | Gln182:HE21 - Lig:O1   | Hydrogen Bond                | 1.99         |
|          | Thr190:H - Lig:N2      | Hydrogen Bond                | 2.87         |
|          | Thr26:H - Lig:C11      | Halogen Bond                 | 2.65         |
| V282     | Lig:H22 - Met49:O      | Hydrogen Bond                | 3.16         |

|      |                      |                              |      |
|------|----------------------|------------------------------|------|
|      | Lig:H14 – Phe140:O   | Hydrogen Bond                | 2.27 |
|      | Asn142:HD22 – Lig:O1 | Hydrogen Bond                | 2.42 |
|      | Lig:H11 – Asp187:O   | Hydrogen Bond                | 3.31 |
|      | Gln189:HE21 – Lig:O2 | Hydrogen Bond                | 1.77 |
|      | Gln192:H – Lig:Cl1   | Halogen Bond                 | 2.27 |
| V139 | Cys44:HG – Lig:O3    | Hydrogen Bond                | 2.97 |
|      | Lig:H12 – His164:O   | Hydrogen Bond                | 2.35 |
|      | Gln189:HE21 – Lig:O2 | Hydrogen Bond                | 2.08 |
|      | Thr26:O – Lig:Cl1    | Halogen Bond                 | 3.32 |
|      | Thr26:H – Lig:Cl1    | Halogen Bond                 | 3.48 |
| V231 | Lig:H23 – His164:O   | Hydrogen Bond                | 3.36 |
|      | Glu166:H – Lig:O1    | Hydrogen Bond                | 2.59 |
|      | Gln189:HE21 – Lig:O3 | Hydrogen Bond                | 1.87 |
|      | Lig:H7 – Gln192:O    | Hydrogen Bond                | 2.06 |
| V128 | Thr26:H – Lig:O2     | Hydrogen Bond                | 2.14 |
|      | Gly143:H- Lig:N3     | Hydrogen Bond                | 2.06 |
|      | Lig:H19 – Glu166:O   | Hydrogen Bond                | 1.60 |
|      | Glu166:H – Lig:O1    | Hydrogen Bond                | 1.87 |
|      | Lig:H5 – Gln189:OE1  | Hydrogen Bond                | 1.87 |
| V160 | Thr26:H – Lig:O2     | Hydrogen Bond                | 2.23 |
|      | Gly143:H – Lig:O2    | Hydrogen Bond                | 1.85 |
|      | Cys145:H – Lig:O1    | Hydrogen Bond                | 3.14 |
|      | Lig:H4 – Glu166:O    | Hydrogen Bond                | 2.10 |
| V163 | Thr26:H – Lig:O2     | Hydrogen Bond                | 2.27 |
|      | Gly143:H – Lig:O1    | Hydrogen Bond                | 1.79 |
|      | Cys145:H – Lig:O1    | Hydrogen Bond                | 3.02 |
| V174 | Thr26:H – Lig:O2     | Hydrogen Bond                | 2.89 |
|      | His41:HD1 – Lig:N3   | Hydrogen Bond                | 2.13 |
|      | Gly143:H – Lig:O1    | Hydrogen Bond                | 1.99 |
|      | Cys145:H – Lig:O1    | Hydrogen Bond                | 3.12 |
|      | Gln192:H – Lig:Cl2   | Halogen Bond                 | 1.98 |
|      | Gln192:O – Lig:Cl2   | Halogen Bond                 | 3.37 |
|      | His41 - Lig          | Hydrophobic (Pi-Pi Stacking) | 4.11 |
| V243 | Asn142:HD21 - Lig:O3 | Hydrogen Bond                | 1.91 |
|      | Gly143:H - Lig:O4    | Hydrogen Bond                | 2.14 |
|      | Glu166:H - Lig:O1    | Hydrogen Bond                | 2.14 |
|      | Lig:H1 - Arg188:O    | Hydrogen Bond                | 2.31 |
|      | Lig:H24 - Thr26:O    | Hydrogen Bond                | 2.02 |
|      | His41 - Lig          | Hydrophobic (Pi-Pi Stacking) | 4.06 |
| V229 | Lig:H23 – His:164    | Hydrogen Bond                | 3.18 |
|      | Glu166:H – Lig:O1    | Hydrogen Bond                | 2.92 |
|      | Gln189:HE21 – Lig:O4 | Hydrogen Bond                | 1.74 |
|      | Gln192:H – Lig:N2    | Hydrogen Bond                | 2.41 |
| V204 | Thr26:H – Lig:O2     | Hydrogen Bond                | 1.91 |
|      | Gly143:H – Lig:O1    | Hydrogen Bond                | 1.92 |
|      | Cys145:H – Lig:O1    | Hydrogen Bond                | 2.66 |
|      | His164:O – Lig:H2    | Hydrogen Bond                | 2.39 |
|      | Lig:H3 – Arg188:O    | Hydrogen Bond                | 2.03 |
|      | Thr24:HG1 – Lig:Cl1  | Halogen Bond                 | 3.31 |
|      | Thr45:H – Lig:Cl2    | Halogen Bond                 | 2.22 |
|      | Thr45:OG1 – Lig:Cl2  | Halogen Bond                 | 3.09 |
| V291 | Lig:N2 - Glu166:OE2  | Salt bridge                  | 4.88 |
|      | Lig:H14 - Thr26:O    | Hydrogen Bond                | 1.94 |
|      | Thr26:H – Lig:N7     | Hydrogen Bond                | 2.92 |
|      | Lig:H12 - His41:O    | Hydrogen Bond                | 2.24 |
|      | Lig:H19 - Asn142:OD1 | Hydrogen Bond                | 2.21 |

|      |                      |                              |      |
|------|----------------------|------------------------------|------|
|      | Asn142:H - Lig:O1    | Hydrogen Bond                | 2.62 |
|      | Gly143:H - Lig:N5    | Hydrogen Bond                | 2.13 |
|      | Cys145:H – Lig:N5    | Hydrogen Bond                | 3.00 |
|      | Lig:H2 - Glu166:OE1  | Hydrogen Bond                | 1.89 |
|      | Lig:H2 - Glu166:OE2  | Hydrogen Bond                | 3.07 |
|      | His41 – Lig          | Hydrophobic (Pi-Pi Stacking) | 4.40 |
|      | His41 – Lig          | Hydrophobic (Pi-Pi Stacking) | 4.58 |
|      | His163 - Lig         | Hydrophobic (Pi-Pi Stacking) | 5.26 |
| V228 | Lig:H1 - His41:NE2   | Hydrogen Bond                | 2.63 |
|      | Asn142:H - Lig:O2    | Hydrogen Bond                | 2.57 |
|      | Lig:H10 - Asn142:OD1 | Hydrogen Bond                | 1.98 |
|      | Lig:H1 - His164:O    | Hydrogen Bond                | 3.10 |
|      | Lig:H21 - Glu166:OE1 | Hydrogen Bond                | 1.68 |
|      | His172:HE2 – Lig:O3  | Hydrogen Bond                | 3.14 |
|      | Gln189:HE21 - Lig:O1 | Hydrogen Bond                | 1.91 |
| V170 | Thr26:H – Lig:O2     | Hydrogen Bond                | 1.94 |
|      | Gly143:H – Lig:O1    | Hydrogen Bond                | 1.97 |
|      | Cys145:H – Lig:O1    | Hydrogen Bond                | 2.88 |
|      | Lig:H12 – Glu166:O   | Hydrogen Bond                | 2.32 |
|      | Thr24:HG1 – Lig:Cl1  | Hydrogen Bond                | 3.21 |
|      | His41 - Lig          | Hydrophobic (Pi-Pi Stacking) | 5.36 |
| V75  | Thr26:H – Lig:O2     | Hydrogen Bond                | 1.99 |
|      | Gly143:H – Lig:O3    | Hydrogen Bond                | 1.95 |
|      | Cys145:H – Lig:O3    | Hydrogen Bond                | 2.53 |
|      | Lig:H15 – Glu166:O   | Hydrogen Bond                | 1.99 |
|      | Gln189:HE21 – Lig:O4 | Hydrogen Bond                | 1.90 |
|      | His41 - Lig          | Hydrophobic (Pi-Pi Stacking) | 5.41 |
| V120 | Asn142:HD21 – Lig:O1 | Hydrogen Bond                | 2.20 |
|      | Gly143:H – Lig:O1    | Hydrogen Bond                | 2.04 |
|      | Cys145:HG – Lig:N4   | Hydrogen Bond                | 2.50 |
|      | Lig:H9 – Glu166:O    | Hydrogen Bond                | 2.09 |
|      | Lig:H14 – Glu166:O   | Hydrogen Bond                | 1.97 |
|      | Gln192:HE21 – Lig:O2 | Hydrogen Bond                | 2.00 |
|      | His41 - Lig          | Hydrophobic (Pi-Pi Stacking) | 4.21 |
| V245 | Thr25:HG1 – Lig:O1   | Hydrogen Bond                | 1.95 |
|      | Thr26:H – Lig:O1     | Hydrogen Bond                | 1.93 |
|      | Gly143:H – Lig:N2    | Hydrogen Bond                | 1.99 |
|      | Cys145:H – Lig:N2    | Hydrogen Bond                | 3.24 |
|      | Glu166:H – Lig:O3    | Hydrogen Bond                | 3.28 |
|      | His41 - Lig          | Hydrophobic (Pi-Pi Stacking) | 5.12 |
| V226 | His41:HD1 – Lig:O1   | Hydrogen Bond                | 1.79 |
|      | Asn142:HD21 – Lig:N2 | Hydrogen Bond                | 2.20 |
|      | Lig:H25 – Glu166:O   | Hydrogen Bond                | 2.25 |
|      | Gln189:HE21 – Lig:O3 | Hydrogen Bond                | 2.07 |
|      | His41 - Lig          | Hydrophobic (Pi-Pi Stacking) | 5.26 |
| V252 | Lig:H17 - Leu141:O   | Hydrogen Bond                | 2.17 |
|      | Asn142:HD21 - Lig:O1 | Hydrogen Bond                | 2.08 |
|      | Gly143:H - Lig:O1    | Hydrogen Bond                | 2.07 |
|      | Gly143:H - Lig:O2    | Hydrogen Bond                | 2.33 |
|      | Cys145:H - Lig:O2    | Hydrogen Bond                | 2.40 |
|      | Lig:H9 - His164:O    | Hydrogen Bond                | 1.99 |
|      | Gln189:HE21 - Lig:O3 | Hydrogen Bond                | 2.85 |
|      | Gln192:H - Lig:O4    | Hydrogen Bond                | 1.95 |
| V154 | Thr26:H – Lig:O2     | Hydrogen Bond                | 2.25 |
|      | Gly143:H – Lig:O1    | Hydrogen Bond                | 1.74 |
|      | Cys145:H – Lig:O1    | Hydrogen Bond                | 2.99 |

|           |                      |                              |      |
|-----------|----------------------|------------------------------|------|
| V304      | Gln192:H – Lig:Br1   | Halogen Bond                 | 2.34 |
|           | His41 – Lig          | Hydrophobic (Pi-Pi Stacking) | 4.28 |
|           | Lig:N1 - Glu166:OE2  | Salt bridge                  | 4.49 |
|           | Lig:H7 – Thr25:OG1   | Hydrogen Bond                | 2.19 |
|           | Ser144:HG – Lig:N3   | Hydrogen Bond                | 2.53 |
|           | Ser144:H – Lig:N4    | Hydrogen Bond                | 2.93 |
|           | Cys145:H – Lig:N4    | Hydrogen Bond                | 2.89 |
|           | Glu166:H – Lig:O1    | Hydrogen Bond                | 1.83 |
|           | Lig:H2 – Glu166:OE1  | Hydrogen Bond                | 2.01 |
|           | His41 – Lig          | Hydrophobic (Pi-Pi Stacking) | 4.98 |
| V172      | His41 – Lig          | Hydrophobic (Pi-Pi Stacking) | 5.17 |
|           | His41 – Lig          | Hydrophobic (Pi-Pi Stacking) | 5.37 |
|           | Thr26:H – Lig:O2     | Hydrogen Bond                | 1.90 |
|           | Lig:H4 – Gln189:OE1  | Hydrogen Bond                | 1.85 |
|           | Gly143:H – Lig:O1    | Hydrogen Bond                | 2.07 |
| V97       | Ser144:H – Lig:O1    | Hydrogen Bond                | 2.32 |
|           | Cys145:H – Lig:O1    | Hydrogen Bond                | 2.34 |
|           | His41:HD1 – Lig:O2   | Hydrogen Bond                | 1.84 |
|           | Thr26:H – Lig:O3     | Hydrogen Bond                | 2.06 |
|           | Glu166:H – Lig:N2    | Hydrogen Bond                | 2.15 |
| V111      | Lig:H1 – Glu166:O    | Hydrogen Bond                | 2.32 |
|           | Gln189:HE21 – Lig:O1 | Hydrogen Bond                | 1.84 |
|           | His41 – Lig          | Hydrophobic (Pi-Pi Stacking) | 4.92 |
|           | Thr26:H – Lig:O2     | Hydrogen Bond                | 2.07 |
|           | Lig:H6 – His41:NE2   | Hydrogen Bond                | 2.58 |
|           | Asn142:HD21 – Lig:O1 | Hydrogen Bond                | 2.11 |
|           | Gly143:H – Lig:O1    | Hydrogen Bond                | 1.91 |
|           | Lig:H2 – His164:O    | Hydrogen Bond                | 2.86 |
| V238      | Lig:H3 – Val186:O    | Hydrogen Bond                | 3.44 |
|           | Arg188:O – Lig:H3    | Hydrogen Bond                | 2.10 |
|           | Ser46:H – Lig:Br1    | Halogen Bond                 | 2.71 |
|           | His41:HD1 – Lig:O2   | Hydrogen Bond                | 2.02 |
|           | Asn142:HD21 – Lig:O3 | Hydrogen Bond                | 1.98 |
| V60       | Gly143:H – Lig:O3    | Hydrogen Bond                | 2.26 |
|           | Gln192:HE21 – Lig:N2 | Hydrogen Bond                | 3.15 |
|           | His41 – Lig          | Hydrophobic (Pi-Pi Stacking) | 4.73 |
|           | Thr26:H – Lig:O3     | Hydrogen Bond                | 2.15 |
|           | Gly143:H – Lig:O2    | Hydrogen Bond                | 2.00 |
| V103      | Cys145:H – Lig:O2    | Hydrogen Bond                | 2.96 |
|           | His41:HD1 – Lig:N3   | Hydrogen Bond                | 1.96 |
|           | Lig:H6 – Arg188:O    | Hydrogen Bond                | 2.76 |
|           | His41 – Lig          | Hydrophobic (Pi-Pi Stacking) | 4.17 |
|           | Thr24:O – Lig:H8     | Hydrogen Bond                | 2.19 |
| Nilotinib | Ser46:H – Lig:N2     | Hydrogen Bond                | 2.37 |
|           | Gly143:H – Lig:O2    | Hydrogen Bond                | 1.74 |
|           | Cys145:H – Lig:O2    | Hydrogen Bond                | 3.37 |
|           | Glu166:H – Lig:O3    | Hydrogen Bond                | 1.85 |
|           | Asn142:HD22 - Lig:O1 | Hydrogen Bond                | 2.56 |
|           | Asn142:HD21 - Lig:N6 | Hydrogen Bond                | 2.33 |
|           | Cys145:HG - Lig:N5   | Hydrogen Bond                | 2.48 |
|           | Lig:H16 - His164:O   | Hydrogen Bond                | 2.58 |
|           | Lig:H9 - Glu166:OE2  | Hydrogen Bond                | 1.96 |
|           | Gln189:HE21 – Lig:N6 | Hydrogen Bond                | 2.01 |
|           | Gln189:HE22 - Lig:O1 | Hydrogen Bond                | 2.06 |

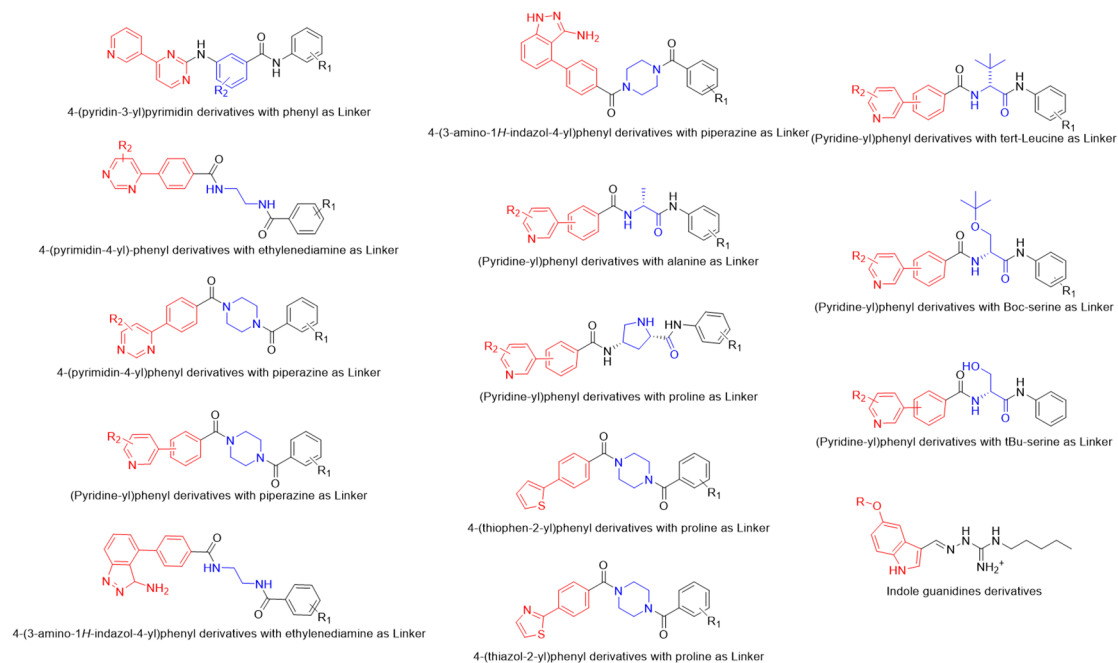

Figure S1. Structure types of all compounds.

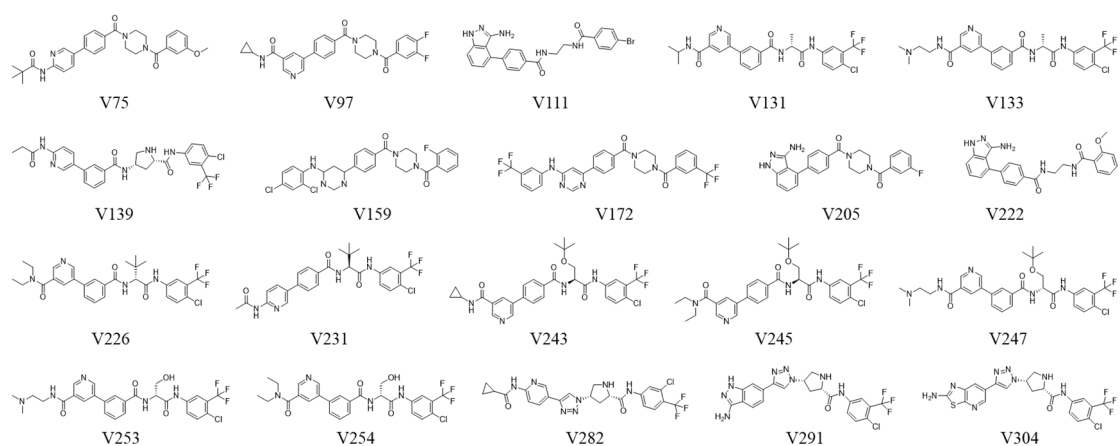

Figure S2. Structures of the specific 20 compounds selected for MD analyses.

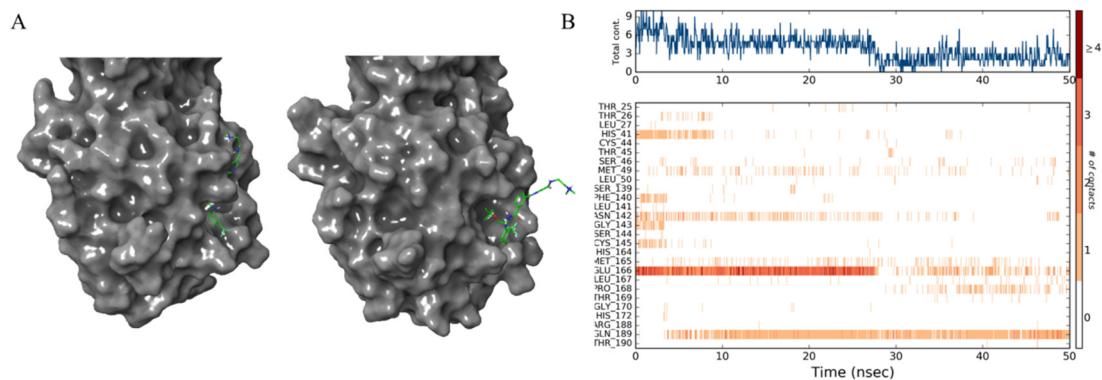

Figure S3. (A) Spatial structure of V247-M<sup>pro</sup> complex at different times during dynamic simulation. At 1ns, the molecule binds closely to the protein (left); at 28ns, N-(2-dimethylamino)ethyl)nicotinamide of ligand structure has separated from the protein surface (right). (B) The interaction between V247 and the residues of the M<sup>pro</sup> during 20 ns. Top panel shows the total number of specific contacts the protein makes with the ligand over the course of the trajectory, and bottom panel shows which residues interact with the ligand in each trajectory frame.

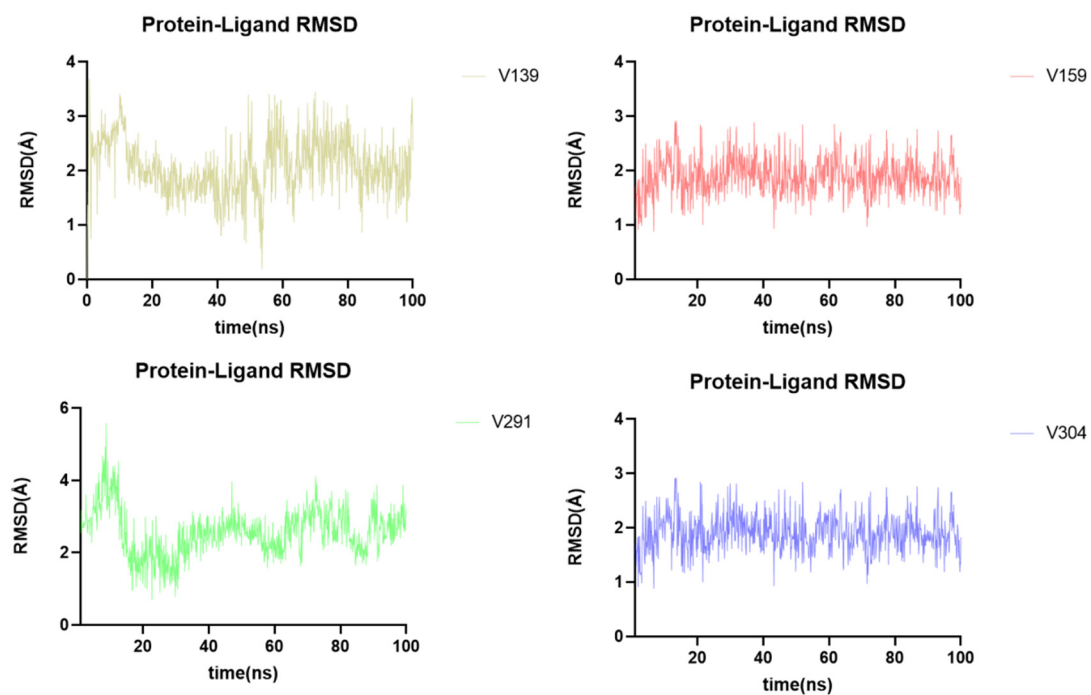

Figure S4. Results of 100ns molecular dynamics simulations of 4 representative compound-protein complexes.



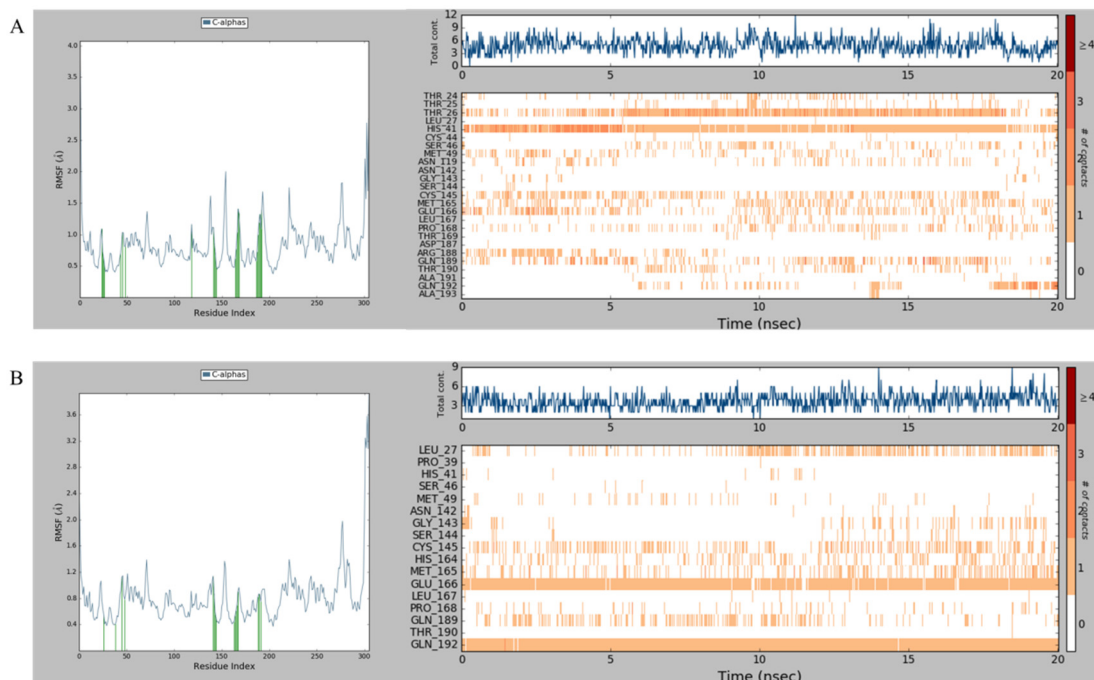

Figure S5. Protein RMSF plot (left) and Protein-Ligand Contacts (right) of V75-M<sup>Pro</sup> complex (A) and V97-M<sup>Pro</sup> complex (B)

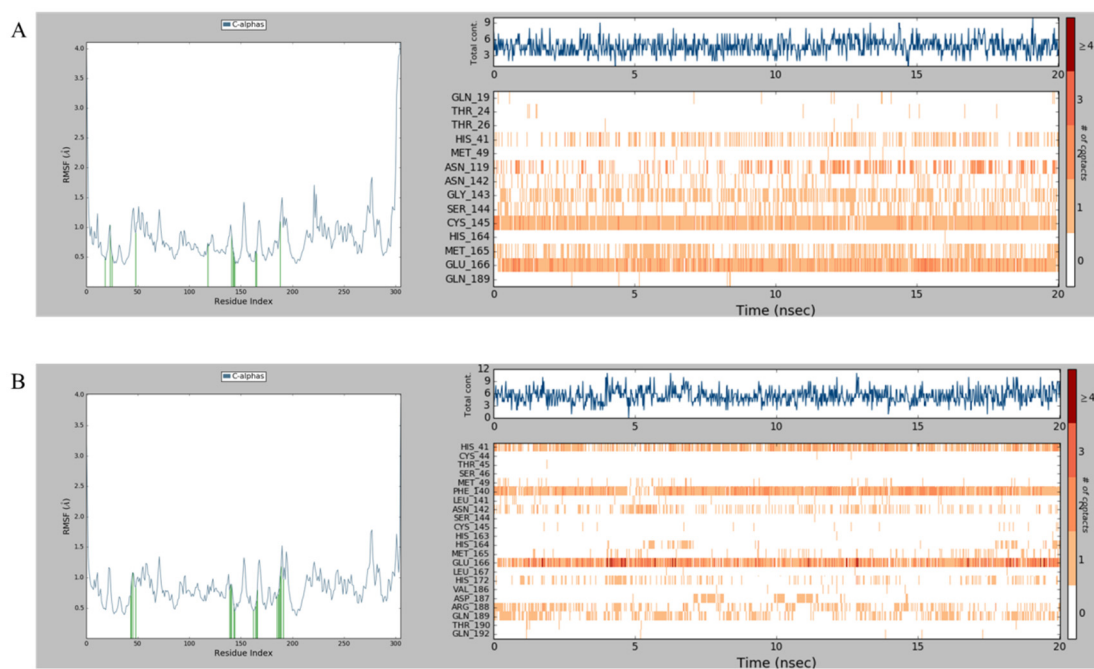

Figure S6. Protein RMSF plot (left) and Protein-Ligand Contacts (right) of V111-M<sup>Pro</sup> complex (A) and V139-M<sup>Pro</sup> complex (B)

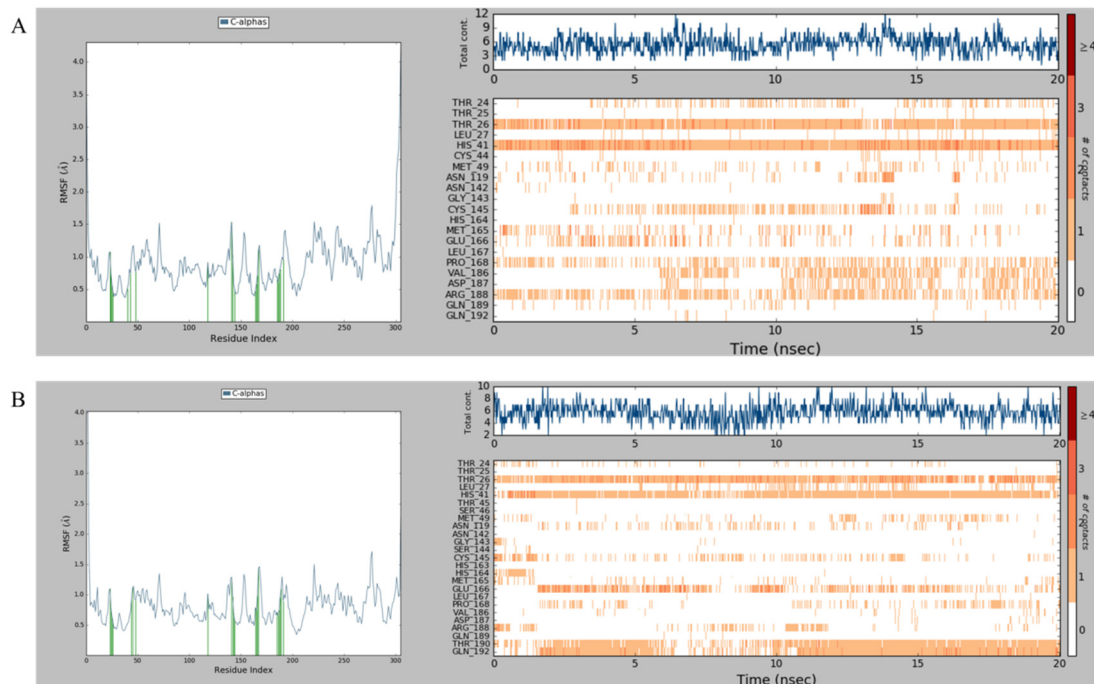

Figure S7 Protein RMSF plot (left) and Protein-Ligand Contacts (right) of V159-M<sup>Pro</sup> complex (A) and V205-M<sup>Pro</sup> complex (B)

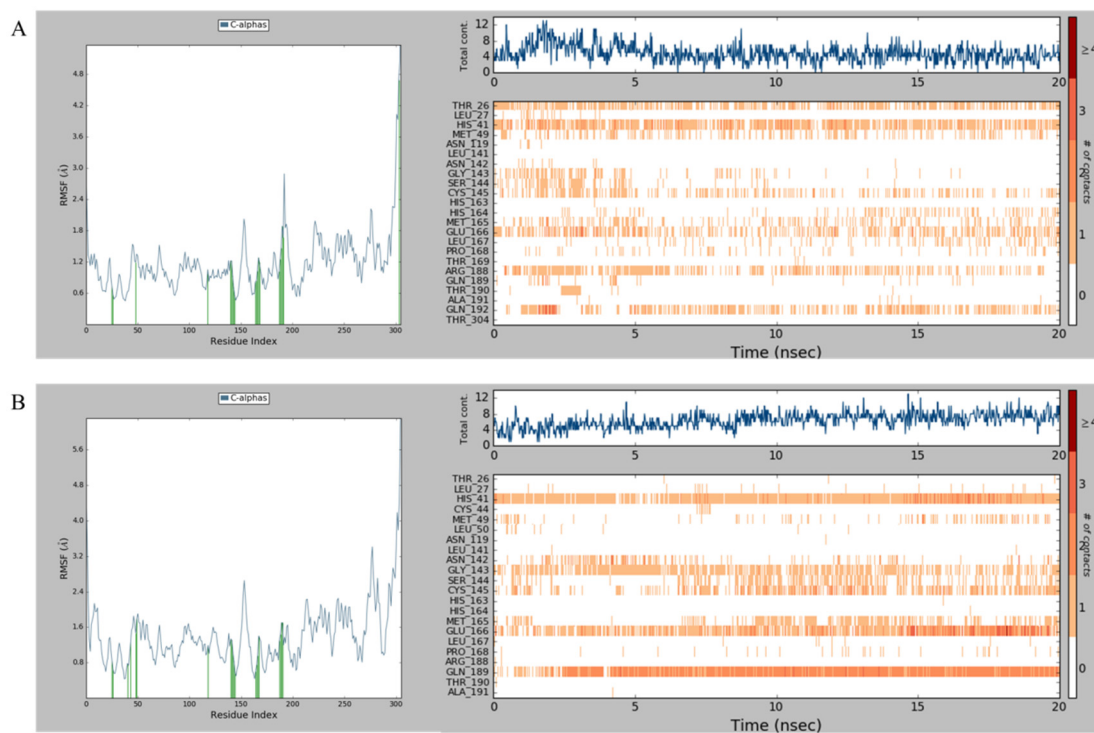

Figure S8. Protein RMSF plot (left) and Protein-Ligand Contacts (right) of V222-M<sup>Pro</sup> complex (A) and V226-M<sup>Pro</sup> complex (B)

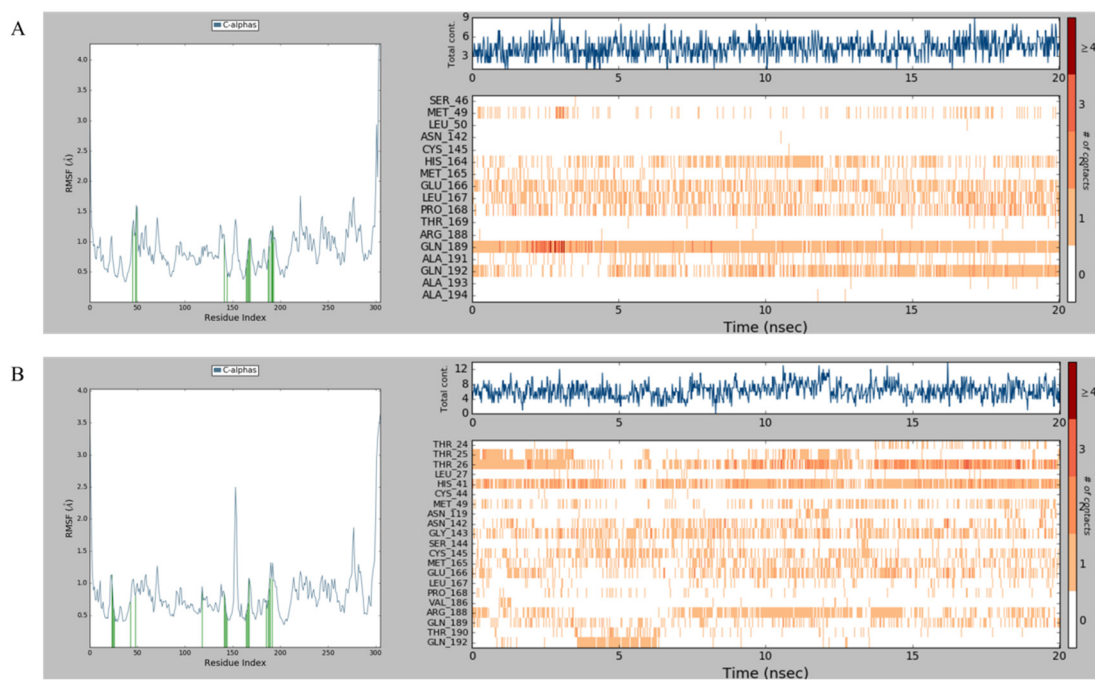

Figure S9. Protein RMSF plot (left) and Protein-Ligand Contacts (right) of V231-M<sup>Pro</sup> complex (A) and V243-M<sup>Pro</sup> complex (B)

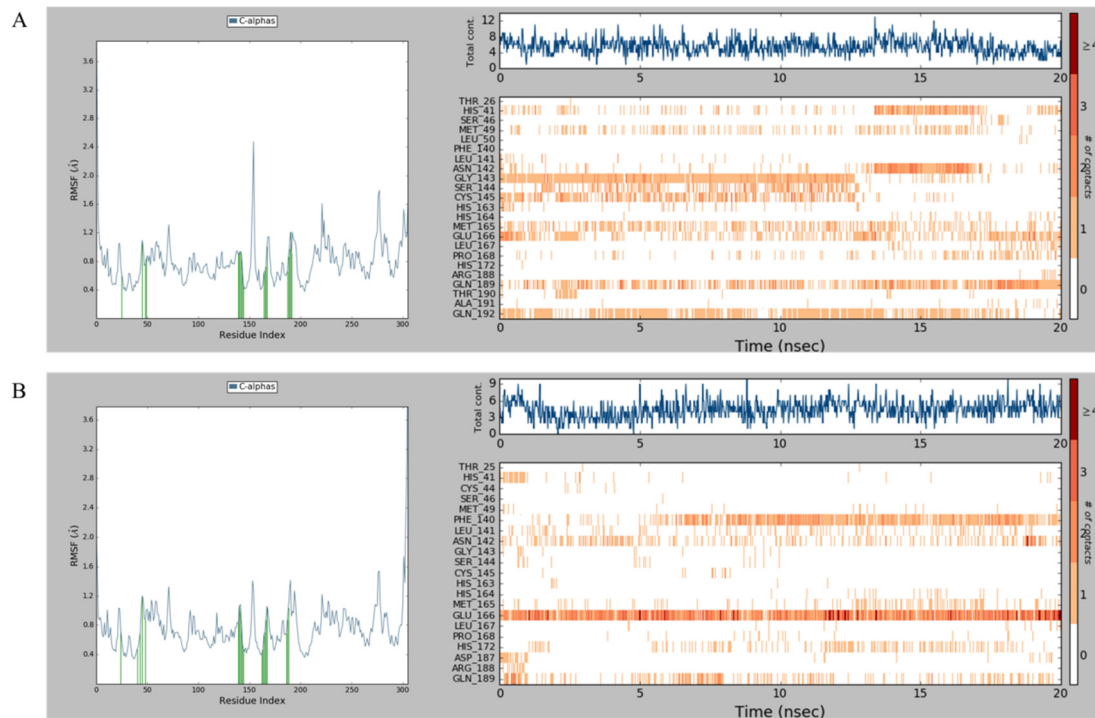

Figure S10. Protein RMSF plot (left) and Protein-Ligand Contacts (right) of V254-M<sup>Pro</sup> complex (A) and V282-M<sup>Pro</sup> complex (B)

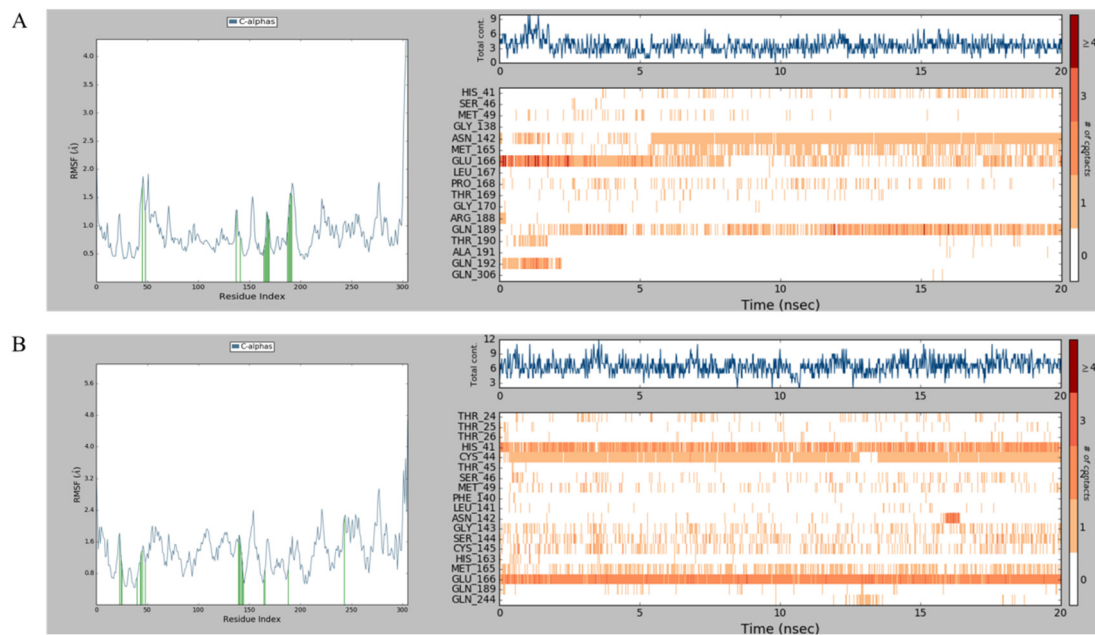

Figure S11. Protein RMSF plot (left) and Protein-Ligand Contacts (right) of V291-M<sup>Pro</sup> complex (A) and V304-M<sup>Pro</sup> complex (B)
